# Supplementary material for: Significance of triple torsional correlations in proteins
Source: Royal Society of Chemistry journal article supplement (doi:10.1039/c9ra02191d), 2019-01-01
Supplement: c9ra02191d1.pdf [file c9ra02191d1.pdf]

# Significance of triple torsional correlations in proteins

Shiyang Long\*, Jianwei Wang† and Pu Tian‡

April 17, 2019

---

\*School of Chemistry, Jilin University

†School of Life Science, Jilin University

‡School of Life Science and School Artificial Intelligence, Jilin University, 2699 Qianjin Street, Changchun, China 130012

## Appendix

The derivation steps of equation 8 on the mutual information of  $A$  and  $B$  was calculated as bellow:

$$\begin{aligned}
MI(AB) &= S(A) + S(B) - S(AB) \\
&\approx - \sum_{i=1}^m w(A_i) * f(A_i) * \ln(f(A_i)) - \sum_{i=1}^m w(B_i) * f(B_i) * \ln(f(B_i)) \\
&\quad + \sum_{i=1}^m \sum_{j=1}^m w(A_i) * w(B_j) * f(A_i, B_j) * \ln(f(A_i, B_j)) \\
&= - \sum_{i=1}^m w(A_i) * (p(A_i)/w(A_i)) * \ln(p(A_i)/w(A_i)) \\
&\quad - \sum_{i=1}^m w(B_i) * (p(B_i)/w(B_i)) * \ln(p(B_i)/L(B_i)) \\
&\quad + \sum_{i=1}^m \sum_{j=1}^m w(A_i) * w(B_j) * \left(\frac{p(A_i, B_j)}{w(A_i) * w(B_j)}\right) * \ln\left(\frac{p(A_i, B_j)}{w(A_i) * w(B_j)}\right) \\
&= - \sum_{i=1}^m p(A_i) * \ln(p(A_i)) + \sum_{i=1}^m p(A_i) * \ln(w(A_i)) - \sum_{j=1}^m p(B_i) * \ln(p(B_i)) \\
&\quad + \sum_{i=1}^m p(B_i) * \ln(w(B_i)) + \sum_{i=1}^m \sum_{j=1}^m p(A_i, B_j) * \ln(p(A_i, B_j)) \\
&\quad - \sum_{i=1}^m \sum_{j=1}^m p(A_i, B_j) * \ln(w(A_i) * w(B_j)) \\
&= - \sum_{i=1}^m p(A_i) * \ln(p(A_i)) - \sum_{i=1}^m p(B_i) * \ln(p(B_i)) \\
&\quad + \sum_{i=1}^m \sum_{i=1}^m p(A_i, B_j) * \ln(p(A_i, B_j)) \\
&= S_p(A) + S_p(B) - S_p(AB)
\end{aligned}$$
